# Supplementary material for: Polycomb Repressive Complex 2 is essential for development and maintenance of a functional TEC compartment
Source: PubMed Central journal article supplement (PMC6156232; doi:10.1038/s41598-018-32729-z), 2018-09-25
Supplement: 41598_2018_32729_MOESM1_ESM.pdf [file 41598_2018_32729_MOESM1_ESM.pdf]

**Supplementary Information for:**

**Polycomb Repressive Complex 2 is essential for development and maintenance of a functional  
TEC compartment**

Nandini Singarapu<sup>1</sup>, Keyue Ma<sup>2</sup>, Kaitlin A.G. Reeh<sup>1</sup>, Jianjun Shen<sup>1</sup>, Jessica N. Lancaster<sup>3</sup>, Song Yi<sup>4</sup>  
Huafeng Xie<sup>5,6</sup>, Stuart Orkin<sup>5,6,7,8</sup>, Nancy R. Manley<sup>9</sup>, Lauren I.R. Ehrlich<sup>3,10</sup>, Ning Jiang<sup>2</sup>, Ellen R.  
Richie<sup>1\*</sup>

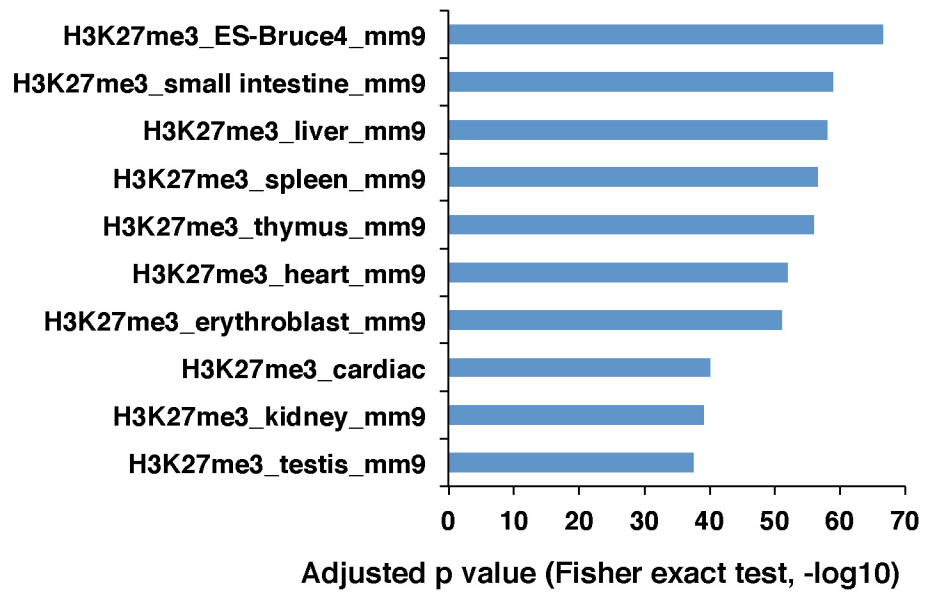

**Figure S1. *Itbx1* mutant DEG are enriched for genes containing H3K27me3 marks.** The ENCODE Histone Modification database was used to assess *Itbx1* DEG for enrichment of genes containing H3K27me3 marks. The top 10 significantly enriched gene sets are plotted. The length of each bar is  $-\log_{10}$  of the adjusted p value calculated using the Fisher exact test and Benjamin-Hochberg corrected for multiple testing.

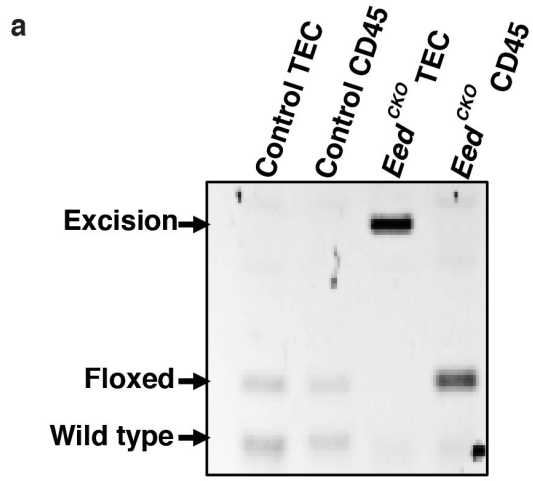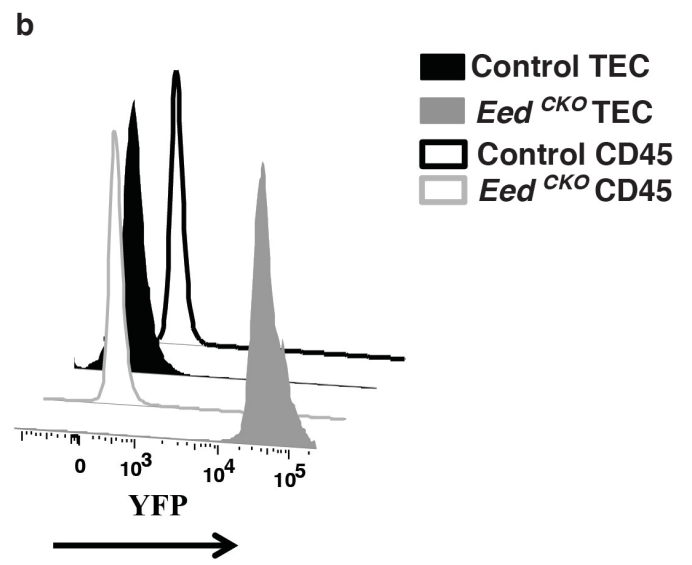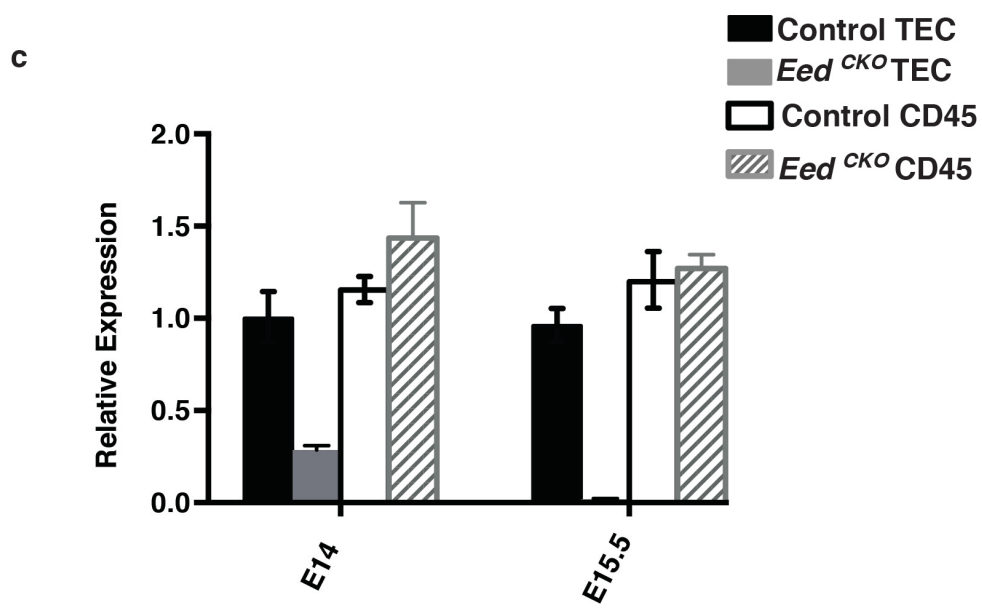

**Figure S2. Deletion of *Eed* in *Foxn1*<sup>Cre/+</sup>;*Eed*<sup>f/f</sup> TEC.** (a) PCR analysis of *Eed* deletion in FACS sorted thymocytes (CD45+ EpCAM- cells) and TEC (CD45- EpCAM+ cells). (b) Flow cytometric analysis of YFP expression by control and *Eed*<sup>CKO</sup> TEC and thymocytes (c) qRT-PCR analysis of *Eed* expressed by E14.5 and E15.5 TEC and thymocytes that were isolated by FACS sorting.

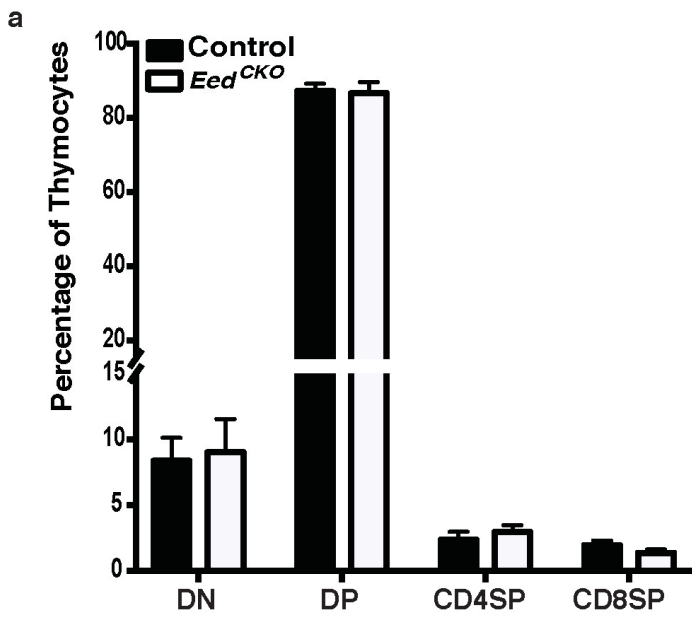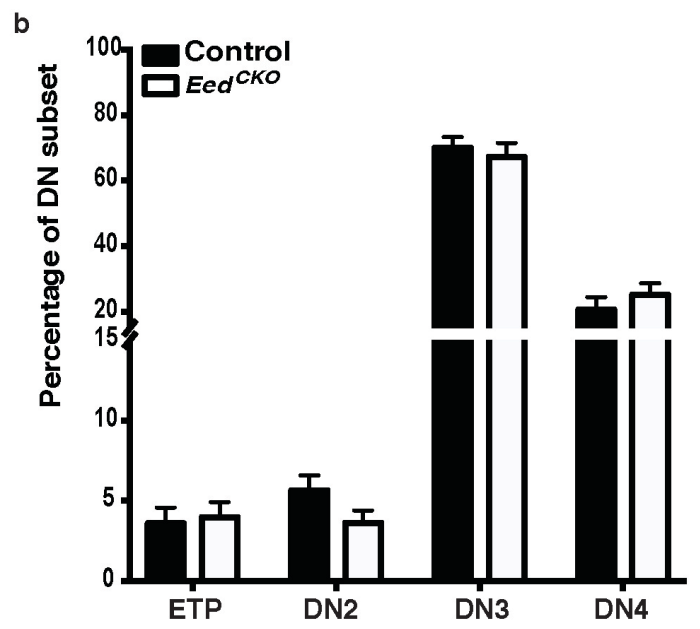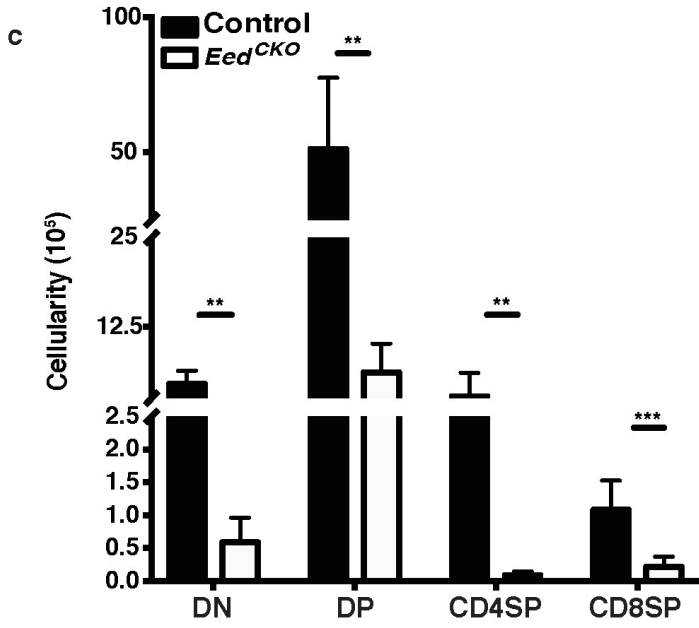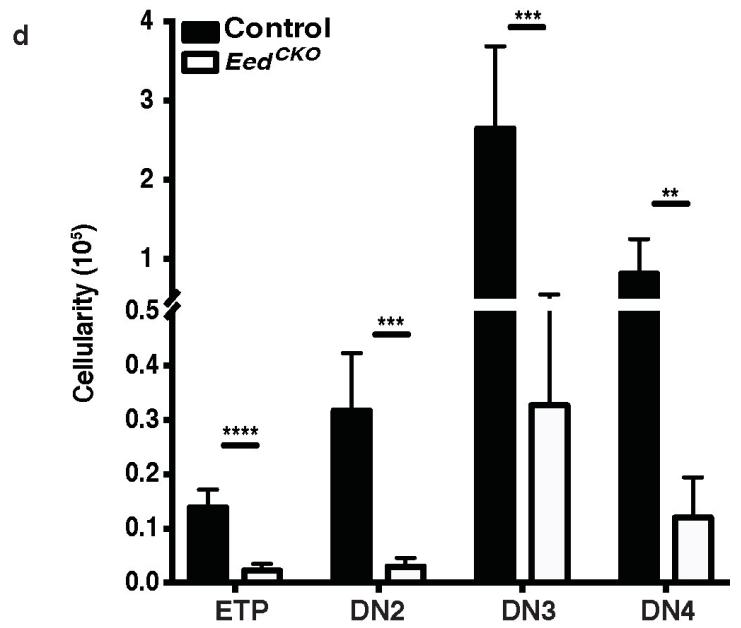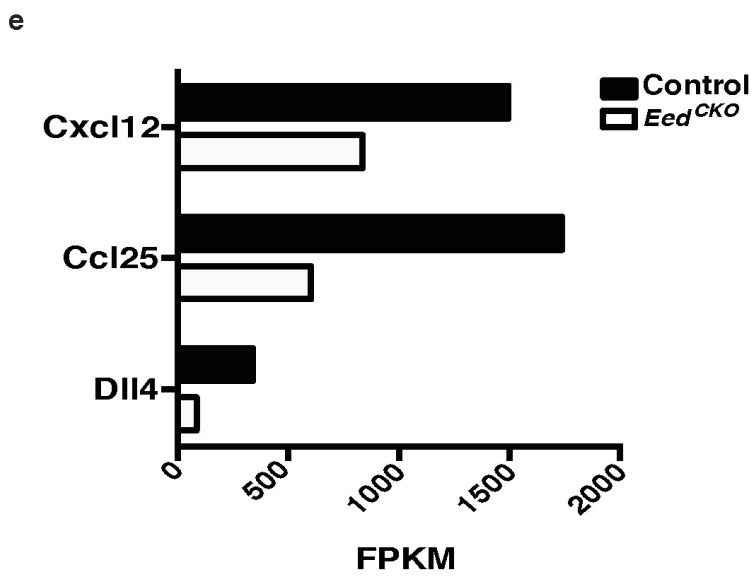

**Figure S3. The number, but not frequency, of thymocyte subsets is adversely affected by deleting *Eed* in the TEC compartment.** (a) Percentage and (c) number of DN (CD4-CD8-), DP (CD4+CD8+), CD4SP (CD4+CD8-) and CD8SP (CD4-CD8+) thymocyte subsets in P0 control and *Eed*<sup>CKO</sup> thymi. (b) Percentage and (d) number of ETP (c-kit+ CD25-), DN2 (c-kit+ CD25+), DN3 (c-kit- CD25+) and DN4 (c-kit- CD25-) subsets in P0 control and *Eed*<sup>CKO</sup> thymi. Electronic gates were set to exclude non-T lineage and TCR positive DN cells. (e) RNA-seq data showing expression of genes encoding ETP niche factors Cxcl12, Ccl25, and Dll4 in control and *Eed*<sup>CKO</sup> TEC. Results are shown as fragments per kilobase of transcript per million mapped reads (FPKM).

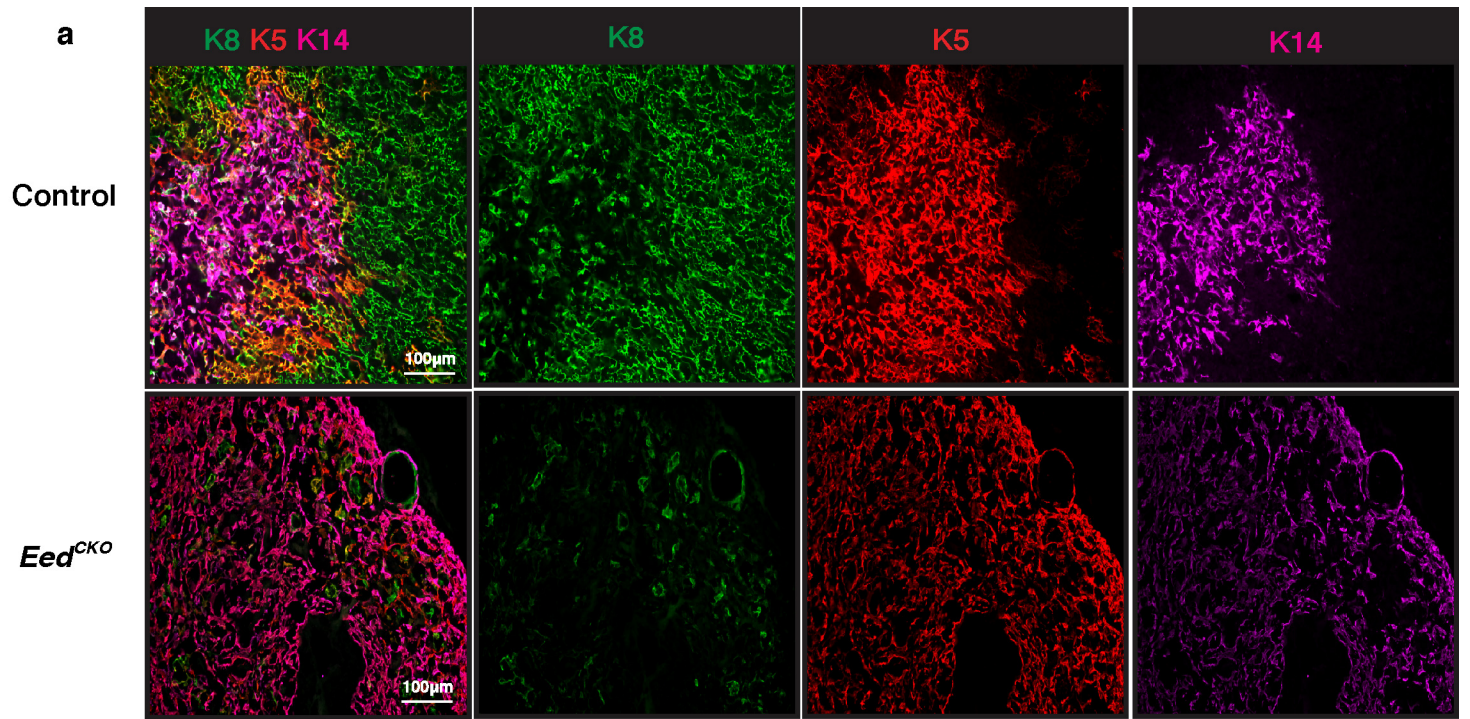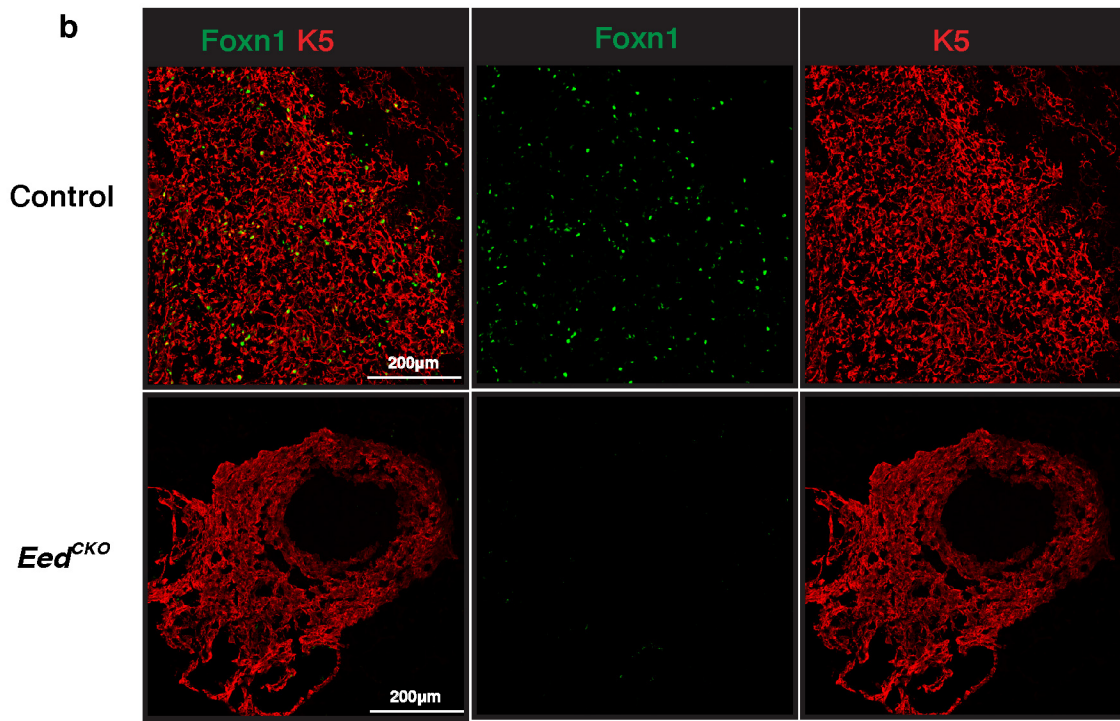



**Figure S4. Primitive basal-like phenotype of epithelial cells remaining in adult *Eed*<sup>CKO</sup> thymic remnants.**

Frozen sections from 4 week old control or *Eed*<sup>CKO</sup> thymi were stained for (a) K8 (green), K5 (red) and K14 (blue) or (b) K5 (red) and FOXN1 (green). White bar indicates scale (100  $\mu$ m).

Table S6. Primers used in this investigation

| <b>Primers</b>            | <b>Sense sequence</b> | <b>Anti-sense sequence</b> |
|---------------------------|-----------------------|----------------------------|
| <b>Genotyping Primers</b> |                       |                            |
| Eed-WT                    | CTACGGGCAGGAGGAAGAG   | GGGGGAGAGGGAGTTGTC         |
| Eed-Floxed                | CTACGGGCAGGAGGAAGAG   | CCACATAGGCTCATAGAATTG      |
| Cre                       | AGGTTCGTTCACTCATGGA   | TCGACCAGTTTAGTTACCC        |
| pRosa26-WT                | AAAGTCGCTCTGAGTTGTTAT | GGAGCGGGAGAAATGGATATG      |
| pRosa26-Tbx1              | AAAGTCGCTCTGAGTTGTTAT | GCGAAGAGTTTGTCTCAACC       |
| <b>qRT-PCR Primers</b>    |                       |                            |
| Foxn1                     | TGACGGAGCACTTCCCTTAC  | GACAGGTTATGGCGAACAGAA      |
| mEed                      | CAACTGTGGGAAGCAACAGA  | ATAGAGGGTGGCTGGTGTG        |
| mHprt                     | CCTCCTCAGACCGCTTTTT   | AACCTGGTTCATCATCGCTAA      |
| mHmbs                     | TCCCTGAAGGATGTGCCTAC  | ACAAGGGTTTTCCCGTTTG        |
|                           |                       |                            |
